# Supplementary material for: Factors Associated with Communities’ Satisfaction of Receiving Curative Care Administered by Community Health Workers in the Health Districts of Boussé and Boussouma in Burkina Faso, 2024
Source: Preprints.org preprint supplement (doi:10.20944/preprints202404.1329.v1), 2024-04-19
Supplement: Supplementary file 1 [file supplementary]

**Table S1: Logistic regression conditions**

**Classification table<sup>a,b</sup>**

|                                              |     |    | Preview                         |       | Correct percentage |
|----------------------------------------------|-----|----|---------------------------------|-------|--------------------|
|                                              |     |    | Satisfaction with ASBC services |       |                    |
| Observed                                     |     | No | Yes                             |       |                    |
| Satisfaction with services provided by ASBCs | No  | 0  | 31                              | .0    |                    |
|                                              | Yes | 0  | 929                             | 100.0 |                    |
| Global percentage                            |     |    |                                 | 96.8  |                    |

**Equation variables**

|                | B     | E.S  | Wald    | ddl | Sig. | Exp(B) |
|----------------|-------|------|---------|-----|------|--------|
| Constant value | 3.400 | .183 | 346.813 | 1   | .000 | 29.968 |

**Composite tests of model coefficients**

|       | Chi-square | ddl | Sig. |
|-------|------------|-----|------|
| Pas   | 42.000     | 18  | ,001 |
| Block | 42.000     | 18  | ,001 |
| Model | 42.000     | 18  | ,001 |

**Table S2 :** Description des dimensions de qualité des soins dans la perspective du consommateur selon BENINGUISSE

| <b>Dimensions of BENEGUISSE's conceptual model</b> | <b>Description of the dimensions</b>                                                                                                                                                                                       |
|----------------------------------------------------|----------------------------------------------------------------------------------------------------------------------------------------------------------------------------------------------------------------------------|
| <b>Geographical accessibility</b>                  | The degree to which the proximity or remoteness of health services suits users in terms of distance/time to get there                                                                                                      |
| <b>Organizational accessibility</b>                | The extent to which the way services are organised is suitable for users in terms of waiting times, cleanliness and comfort of the premises and the attitude of care staff towards courtesy and respect for human dignity. |
| <b>Interpersonal communication</b>                 | The carer's ability to understand and explain the patient's health problems and to involve the patient in decisions relating to care                                                                                       |
| <b>Technical skills</b>                            | The carer's ability to effectively manage the patient's health problems to their satisfaction                                                                                                                              |
| <b>Care continuity</b>                             | The way in which distinct elements of patient care are linked together over time and between different providers                                                                                                           |

**Table S3: Results of bivariate analyses with statistically significant associations**

## Level of education \* Satisfaction with CBHWs services

|                      | Value               | ddl | Asymptotic significance (bilateral) |
|----------------------|---------------------|-----|-------------------------------------|
| Pearson chi-square   | 29.902 <sup>a</sup> | 5   | .000                                |
| Likelihood ratio     | 11.271              | 5   | .046                                |
| N valid observations | 960                 |     |                                     |

## Accessibility in terms of time (waiting time/scheduling of sessions) \* Satisfaction with services offered by CBHWs

|                      | Value               | ddl | Asymptotic significance (bilateral) |
|----------------------|---------------------|-----|-------------------------------------|
| Pearson chi-square   | 13.179 <sup>a</sup> | 4   | .010                                |
| Likelihood ratio     | 11.334              | 4   | .023                                |
| N valid observations | 960                 |     |                                     |

## CBHWs Reception \* Confidence in CBHWs prescriptions

|                      | Value               | ddl | Asymptotic significance (bilateral) |
|----------------------|---------------------|-----|-------------------------------------|
| Pearson chi-square   | 15.069 <sup>a</sup> | 3   | .002                                |
| Likelihood ratio     | 9.954               | 3   | .019                                |
| N valid observations | 960                 |     |                                     |

## Cultural accessibility (speaks the same language/same habits, etc.) \* Confidence in CBHWs prescriptions

|                      | Value               | ddl | Asymptotic significance (bilateral) |
|----------------------|---------------------|-----|-------------------------------------|
| Pearson chi-square   | 38.671 <sup>a</sup> | 3   | .000                                |
| Likelihood ratio     | 16.137              | 3   | .001                                |
| N valid observations | 960                 |     |                                     |

## Vulnerability status \* Confidence in CBHWs requirements

|                    | Value               | ddl | Asymptotic significance (bilateral) |
|--------------------|---------------------|-----|-------------------------------------|
| Pearson chi-square | 35.276 <sup>a</sup> | 4   | .000                                |
| Likelihood ratio   | 13.853              | 4   | .008                                |

|                      |     |  |  |
|----------------------|-----|--|--|
| N valid observations | 960 |  |  |
|----------------------|-----|--|--|
